# Supplementary material for: Plain Water Intake and Association With the Risk of Overweight in the Chinese Adult Population: China Health and Nutrition Survey 2006–2011
Source: PubMed Central journal article supplement (PMC7025921; doi:10.2188/jea.je20180223), 2020-03-05
Supplement: je-30-128-s001.pdf [file je-30-128-s001.pdf]

**eTable 1.** Description of beverage consumption per day based on PWI among 3,200 Chinese adults aged 18 to 65 years old

| Variables    | Plain water intake |            |            |            |
|--------------|--------------------|------------|------------|------------|
|              | 0–1 cup            | 2–3 cups   | 4–5 cups   | ≥6 cups    |
| <i>Men</i>   |                    |            |            |            |
| Coffee       | 8 (1.4)            | 5 (1.4)    | 5 (1.4)    | 7 (1.9)    |
| *Tea         | 596 (18.9)         | 450 (10.6) | 255 (10.7) | 279 (20.6) |
| CBSDs        | 5 (1.3)            | 8 (1.2)    | 8 (1.9)    | 9 (2.0)    |
| Non-CBSDs    | 7 (1.5)            | 8 (1.3)    | 7 (1.8)    | 8 (1.8)    |
| Sugared      | 12 (0.9)           | 12 (1.7)   | 12 (1.8)   | 9 (2.2)    |
| Grape wine   | 5 (1.2)            | 5 (0.6)    | 4 (0.8)    | 5 (1.2)    |
| Liquor       | 49 (1.6)           | 48 (1.3)   | 45 (1.5)   | 48 (2.4)   |
| Beer         | 86 (1.1)           | 98 (3.6)   | 87 (4.3)   | 98 (8.3)   |
| <i>Women</i> |                    |            |            |            |
| Coffee       | 5 (1.7)            | 4 (1.3)    | 4 (2.1)    | 5 (3.5)    |
| *Tea         | 427 (22.2)         | 348 (6.3)  | 143 (7.9)  | 161 (14.5) |
| CBSDs        | 6 (1.6)            | 6 (1.6)    | 6 (2.4)    | 5 (2.9)    |
| Non-CBSDs    | 13 (1.5)           | 10 (1.5)   | 13 (1.8)   | 11 (1.8)   |
| Sugared      | 11 (1.4)           | 9 (1.6)    | 10 (1.8)   | 15 (2.4)   |
| Grape wine   | 1 (0.3)            | 1 (0.1)    | 1 (0.2)    | 1 (0.2)    |
| Liquor       | 1 (0.2)            | 1 (0.2)    | 1 (0.2)    | 1 (0.2)    |
| Beer         | 8 (1.6)            | 6 (0.7)    | 7 (1.3)    | 12 (2.8)   |

CBSDs, Chinese brand soft drinks; non-CBSDs, non-Chinese brand soft drinks; PWI, plain water intake.

Data was presented as mean (standard error). \*  $p$ -value<0.05.

**eTable 2.** Description of beverage consumption per day based on PWI among 1,982 Chinese adults aged 18 to 50 years old

| Variables    | Plain water intake |            |            |            |
|--------------|--------------------|------------|------------|------------|
|              | 0–1 cup            | 2–3 cups   | 4–5 cups   | ≥6 cups    |
| <i>Men</i>   |                    |            |            |            |
| Coffee       | 7 (2.1)            | 5 (1.8)    | 6 (1.9)    | 7 (2.1)    |
| Tea          | 284 (19.3)         | 261 (12.4) | 242 (13.8) | 277 (22.3) |
| CBSDs        | 5 (1.8)            | 7 (1.7)    | 8 (2.3)    | 9 (2.5)    |
| Non-CBSDs    | 7 (1.9)            | 7 (1.5)    | 7 (1.7)    | 8 (2.1)    |
| Sugared      | 13 (1.4)           | 12 (2.0)   | 11 (2.2)   | 9 (2.8)    |
| Grape wine   | 5 (1.8)            | 4 (1.4)    | 4 (1.6)    | 4 (1.9)    |
| Liquor       | 50 (2.8)           | 49 (2.1)   | 43 (1.9)   | 48 (2.7)   |
| Beer         | 88 (1.5)           | 88 (3.5)   | 97 (5.1)   | 96 (10.1)  |
| <i>Women</i> |                    |            |            |            |
| Coffee       | 5 (2.1)            | 4 (1.7)    | 4 (2.3)    | 4 (4.0)    |
| Tea          | 182 (23.5)         | 155 (10.5) | 161 (12.7) | 175 (18.6) |
| CBSDs        | 6 (2.2)            | 6 (2.4)    | 6 (2.7)    | 5 (3.3)    |
| Non-CBSDs    | 12 (1.8)           | 13 (1.8)   | 12 (1.8)   | 11 (2.4)   |
| Sugared      | 11 (2.0)           | 10 (1.9)   | 10 (2.2)   | 12 (2.9)   |
| Grape wine   | 1 (0.6)            | 1 (0.2)    | 1 (0.3)    | 1 (0.2)    |
| Liquor       | 1 (0.2)            | 1 (0.2)    | 1 (0.2)    | 1 (0.2)    |
| Beer         | 8 (1.6)            | 6 (0.7)    | 7 (1.3)    | 12 (2.8)   |

CBSDs, Chinese brand soft drinks; non-CBSDs, non-Chinese brand soft drinks; PWI, plain water intake.

Data was presented as mean (standard error). \*  $p$ -value<0.05.
